# Supplementary material for: Mitochondria form contact sites with the nucleus to couple pro-survival retrograde response
Source: bioRxiv or medRxiv preprint supplement (doi:10.1101/445411), 2020-05-07

# Supplementary Figure 2

**a**

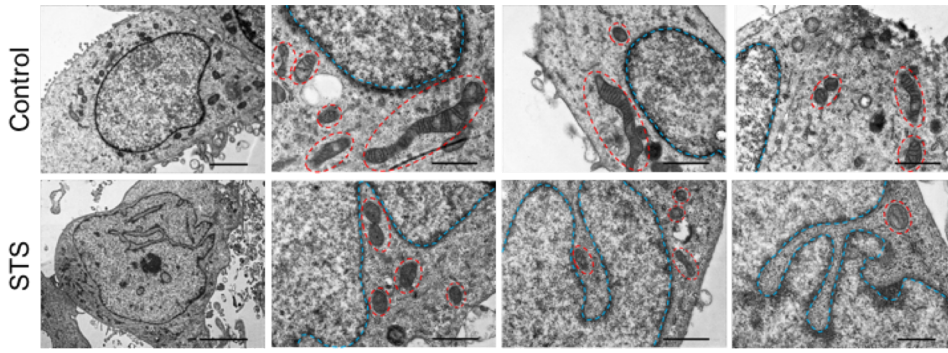

**b**

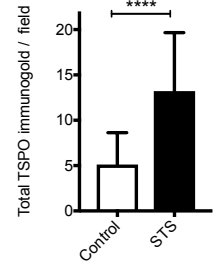

**c**

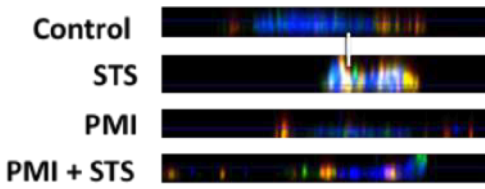

**d**

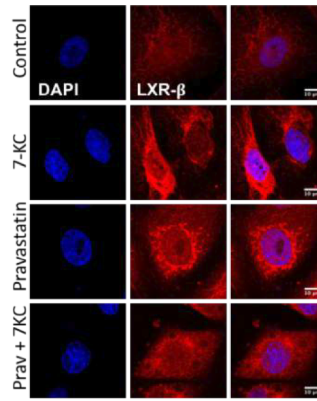

**e**

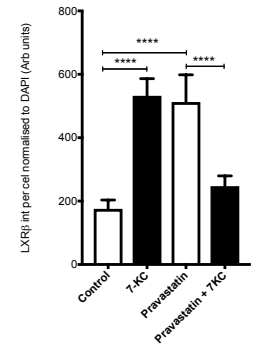

**f**

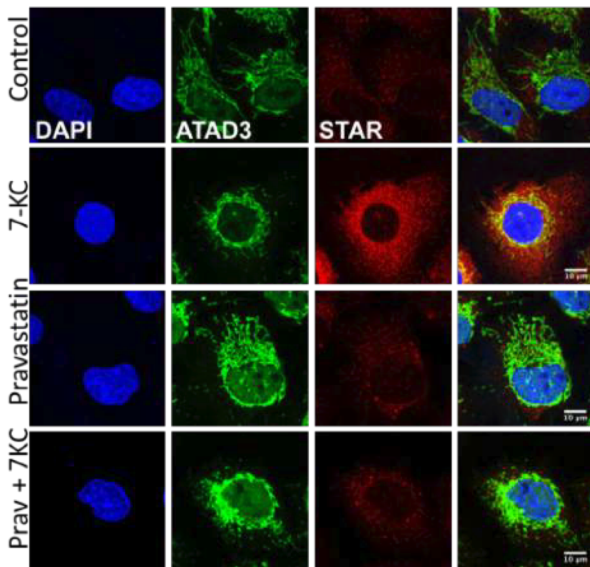

**g**

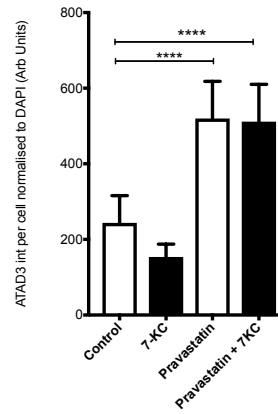

**h**

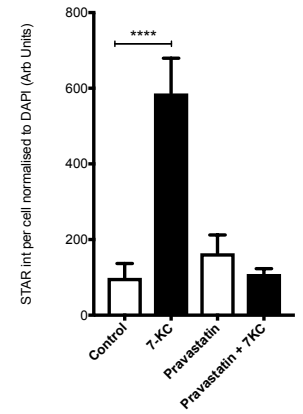

# Supplementary Figure 3

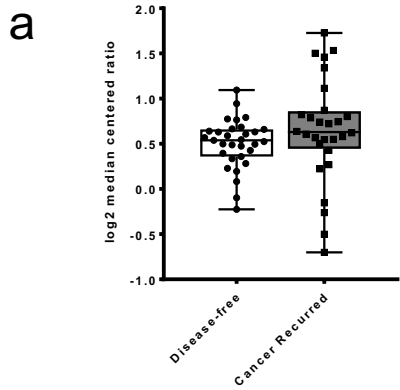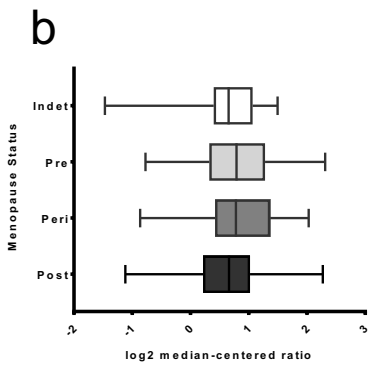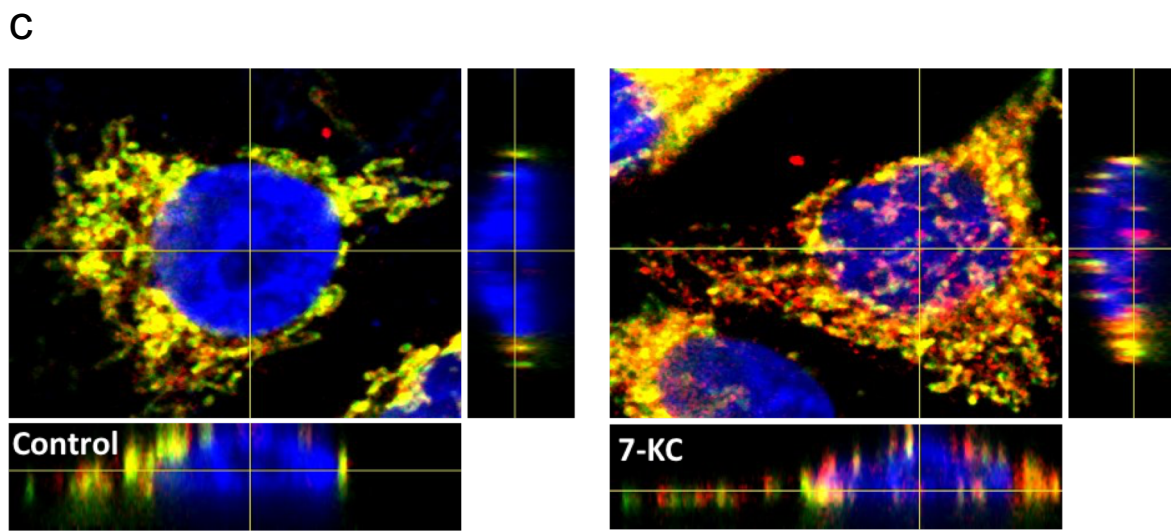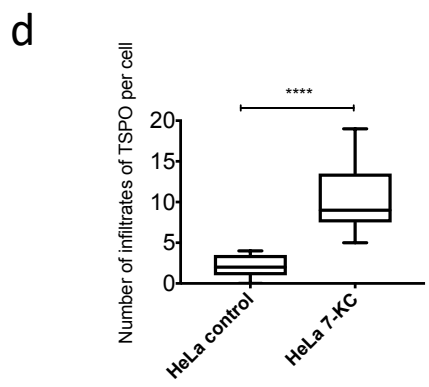

Supplement: Supplementary file [file 445411-1.pdf]
